# Supplementary material
Source: PubMed Central journal article supplement (PMC3473164)

# Figure S1

*rEc7*      *rEc7*  
*ΔprfA*    *ΔprfA*  
                 *ΔtolC*

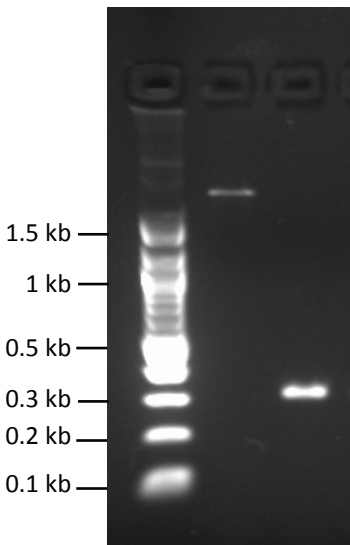

Supplement: NIHMS407933-supplement-02.pdf [file NIHMS407933-supplement-02.pdf]
